# Supplementary material
Source: PubMed Central journal article supplement (PMC5877856)
Supplement: 13337_2018_429_MOESM1_ESM.pdf [file 13337_2018_429_MOESM1_ESM.pdf]

**Molecular evidence of an isolate of mungbean yellow mosaic India virus with a recombinant DNA B component occurring on mungbean from mid-hills of Meghalaya, India**

**VirusDisease**

Amrita Banerjee<sup>a\*</sup>§, Yashi Umbrey<sup>b</sup>, Rohit M Yadav<sup>c</sup> and Somnath Roy<sup>c</sup>

<sup>a</sup>ICAR Research Complex for NEH Region, Umiam 793 103, Meghalaya, India

<sup>b</sup>College of Post Graduate Studies, Central Agricultural University, Umiam 793 103, Meghalaya, India

<sup>c</sup>ICAR-National Bureau of Plant Genetic Resources, Regional Station, Umiam 793 103, Meghalaya, India

§Corresponding author: [amrita.banerjee@icar.gov.in](mailto:amrita.banerjee@icar.gov.in) / [amrita.ars@gmail.com](mailto:amrita.ars@gmail.com)

**Supplementary Table 1** Reference DNA A sequences of MYMIV, MYMV, HgYMV and DoYMV used for comparison with Mg-mungbean-1

| Sl. No. | Isolate                                    | Accession No. | Reference                                 |
|---------|--------------------------------------------|---------------|-------------------------------------------|
| 1.      | MYMIV:India:SoybeanTN                      | AJ416349      | Girish and Usha (2005)                    |
| 2.      | MYMIV:India:Palampur                       | FN794200      | Kumar <i>et al.</i> (2011)                |
| 3.      | MYMIV:India:cloneCA4                       | KC911719      | Kanakala <i>et al.</i> (2013) unpublished |
| 4.      | MYMIV:India:cloneCA3                       | KC911720      | Kanakala <i>et al.</i> (2013) unpublished |
| 5.      | MYMIV:India                                | DQ389153      | Rouhibakhsh <i>et al.</i> (2008)          |
| 6.      | MYMIV:India:MJS1                           | KR052025      | Jaidi <i>et al.</i> (2015) unpublished    |
| 7.      | MYMIV:India                                | EU523045      | Yadav <i>et al.</i> (2009)                |
| 8.      | MYMIV:India                                | KC852204      | Ramesh <i>et al.</i> (2013) unpublished   |
| 9.      | Legume yellow mosaic virus:Pakistan:14     | AJ512495      | Hameed and Robinson (2004)                |
| 10.     | Legume yellow mosaic virus:Pakistan:130/12 | AJ512497      | Hameed and Robinson (2004)                |
| 11.     | MYMIV:Pakistan:cloneMI2                    | FM208846      | Ilyas <i>et al.</i> (2010)                |
| 12.     | MYMIV:Pakistan:cloneMI9                    | FM208842      | Ilyas <i>et al.</i> (2010)                |
| 13.     | MYMIV:Pakistan:cloneMI7                    | FM208843      | Ilyas <i>et al.</i> (2010)                |
| 14.     | MYMIV:Pakistan:cloneMI12                   | FM208844      | Ilyas <i>et al.</i> (2010)                |
| 15.     | MYMIV:Pakistan:cloneMI13                   | FM208845      | Ilyas <i>et al.</i> (2010)                |
| 16.     | MYMIV:Pakistan:cloneMI15                   | AM950268      | Ilyas <i>et al.</i> (2010)                |
| 17.     | MYMIV:Pakistan:Mungbean                    | AY269992      | Tsai <i>et al.</i> (2004) unpublished     |
| 18.     | MYMIV:India:Akola                          | AY271893      | Tsai and Green (2004) unpublished         |
| 19.     | MYMIV:Pakistan                             | AM992618      | Ilyas <i>et al.</i> (2010)                |
| 20.     | MYMIV:India                                | DQ400847      | Rouhibakhsh <i>et al.</i> (2008)          |
| 21.     | MYMIV:Pakistan:cloneMI72                   | FM955599      | Ilyas <i>et al.</i> (2010)                |
| 22.     | MYMIV:Pakistan:cloneMI76                   | FM955600      | Ilyas <i>et al.</i> (2010)                |
| 23.     | MYMIV:Pakistan:cloneA1                     | FM208833      | Ilyas <i>et al.</i> (2010)                |
| 24.     | MYMIV:Pakistan:cloneA1E                    | FM208834      | Ilyas <i>et al.</i> (2010)                |

|     |                                             |          |                                                 |
|-----|---------------------------------------------|----------|-------------------------------------------------|
| 25. | Legume yellow mosaic virus:<br>Pakistan:106 | AJ512498 | Hameed and Robinson (2004)                      |
| 26. | MYMIV:Nepal                                 | AY271895 | Tsai and Green (2004) unpublished               |
| 27. | MYMIV:Pakistan:Cowpea                       | AY269990 | Tsai <i>et al.</i> (2004) unpublished           |
| 28. | MYMIV:Pakistan:cloneA2                      | FM208835 | Ilyas <i>et al.</i> (2010)                      |
| 29. | MYMIV:Pakistan:cloneA6G                     | FM208838 | Ilyas <i>et al.</i> (2010)                      |
| 30. | MYMIV:Pakistan:cloneA14                     | FM208839 | Ilyas <i>et al.</i> (2010)                      |
| 31. | MYMIV:India                                 | DQ389154 | Rouhibakhsh <i>et al.</i> (2008)                |
| 32. | MYMIV:Pakistan:cloneA6                      | FM208837 | Ilyas <i>et al.</i> (2010)                      |
| 33. | MYMIV:Pakistan:cloneA17                     | FM208840 | Ilyas <i>et al.</i> (2010)                      |
| 34. | MYMIV:Pakistan:cloneA20                     | FM208841 | Ilyas <i>et al.</i> (2010)                      |
| 35. | MYMIV:Pakistan:cloneMV11                    | FR837935 | Muhammad and Haider (2011)<br>unpublished       |
| 36. | MYMIV:Pakistan:CloneMI75                    | FM955598 | Ilyas <i>et al.</i> (2010)                      |
| 37. | MYMIV:Pakistan:cloneA4                      | FM208836 | Ilyas <i>et al.</i> (2010)                      |
| 38. | MYMIV:India:Varanasi:Dolichos               | AY547317 | Singh <i>et al.</i> (2006)                      |
| 39. | MYMIV:Nepal:clone13P                        | JN543395 | Shahid <i>et al.</i> (2012) unpublished         |
| 40. | MYMIV:Nepal:cloneMA2                        | JQ327845 | Shahid and Natsuaki (2015)<br>unpublished       |
| 41. | MYMIV:Nepal:cloneMA3                        | JQ327846 | Shahid and Natsuaki (2015)<br>unpublished       |
| 42. | MYMIV:India:Varanasi:Frenchbean             | KC019303 | Bhatt <i>et al.</i> (2013) unpublished          |
| 43. | MYMIV:India:Varanasi:Frenchbean             | KC019304 | Bhatt <i>et al.</i> (2013) unpublished          |
| 44. | MYMIV:India:Bangladesh                      | AF314145 | Tsai <i>et al.</i> (2003) unpublished           |
| 45. | Cowpea golden mosaic virus:India            | AY618902 | Chakraborty <i>et al.</i> (2004)<br>unpublished |
| 46. | MYMIV:India:MBK-A25                         | AY937195 | John <i>et al.</i> (2008)                       |
| 47. | MYMIV:Indonesia:Bogor                       | JN368432 | Tsai <i>et al.</i> (2012) unpublished           |
| 48. | MYMIV:Indonesia:Purwakarta1                 | JN368433 | Tsai <i>et al.</i> (2012) unpublished           |
| 49. | MYMIV:Indonesia:Purwakarta2                 | JN368434 | Tsai <i>et al.</i> (2012) unpublished           |
| 50. | MYMIV:Indonesia:Brebes4                     | JN368439 | Tsai <i>et al.</i> (2012) unpublished           |
| 51. | MYMIV:Indonesia:Brebes2                     | JN368436 | Tsai <i>et al.</i> (2012) unpublished           |
| 52. | MYMIV::Indonesia:Brebes1                    | JN368435 | Tsai <i>et al.</i> (2012) unpublished           |
| 53. | MYMIV:Indonesia:Brebes3                     | JN368438 | Tsai <i>et al.</i> (2012) unpublished           |
| 54. | MYMIV:Indonesia:Rembang                     | JN368437 | Tsai <i>et al.</i> (2012) unpublished           |
| 55. | MYMIV:India:Bengal                          | HF922628 | Adhikary <i>et al.</i> (2014) unpublished       |
| 56. | MYMIV:India:clonePPst1                      | KP313758 | Lovejot <i>et al.</i> (2015) unpublished        |
| 57. | MYMV:India:VignaMaharashtra                 | AF314530 | Tsai <i>et al.</i> (2003) unpublished           |
| 58. | MYMV:India:SoybeanMadurai                   | AJ421642 | Girish and Usha (2005)                          |
| 59. | MYMV:India                                  | DQ400848 | Rouhibakhsh <i>et al.</i> (2008)                |

|     |                             |          |                                                  |
|-----|-----------------------------|----------|--------------------------------------------------|
| 60. | MYMV:India:cloneCA1         | KC911721 | Kanakala <i>et al.</i> (2013) unpublished        |
| 61. | MYMV:India:Urdbean:cloneMF2 | JQ398669 | Roy <i>et al.</i> (2012) unpublished             |
| 62. | HgYMV:India                 | AM932427 | Maruthi (2009)                                   |
| 63. | DoYMV:India                 | AY309241 | Surendranath <i>et al.</i> (2003)<br>unpublished |
| 64. | ToLCNDV:India:New Delhi     | U15015   | Padidam <i>et al.</i> (1995)                     |

---
