# Supplementary material
Source: PubMed Central journal article supplement (PMC5877856)
Supplement: 13337_2018_429_MOESM3_ESM.pdf [file 13337_2018_429_MOESM3_ESM.pdf]

**Molecular evidence of an isolate of mungbean yellow mosaic India virus with a recombinant DNA B component occurring on mungbean from mid-hills of Meghalaya, India**

**VirusDisease**

Amrita Banerjee<sup>a\*§</sup>, Yashi Umbrey<sup>b</sup>, Rohit M Yadav<sup>c</sup> and Somnath Roy<sup>c</sup>

<sup>a</sup>ICAR Research Complex for NEH Region, Umiam 793 103, Meghalaya, India

<sup>b</sup>College of Post Graduate Studies, Central Agricultural University, Umiam 793 103, Meghalaya, India

<sup>c</sup>ICAR-National Bureau of Plant Genetic Resources, Regional Station, Umiam 793 103, Meghalaya, India

<sup>§</sup>Corresponding author: [amrita.banerjee@icar.gov.in](mailto:amrita.banerjee@icar.gov.in) / [amrita.ars@gmail.com](mailto:amrita.ars@gmail.com)

**Supplementary Table 3** Details of the genomic components of YMV isolate Mg-mungbean-1 from Meghalaya, India

| Component/ORF | Accession No. | Size (nt) | Predicted ORF Location | Predicted Protein (aa/kDa)                   |
|---------------|---------------|-----------|------------------------|----------------------------------------------|
| <b>DNA A</b>  | KU950430      | 2741      | -                      | -                                            |
| <i>AVI</i>    | ANA08963      | 774       | 316-1089               | Coat protein<br>258/30.00                    |
| <i>AV2</i>    | ANA08962      | 342       | 156-497                | Pre-coat protein<br>114/13.05                |
| <i>AC1</i>    | ANA08967      | 1089      | Complement 1538-2626   | Replication initiation protein<br>363/41.38  |
| <i>AC2</i>    | ANA08966      | 453       | Complement 1228-1680   | Transcription activator protein<br>151/17.10 |
| <i>AC3</i>    | ANA08965      | 405       | Complement 1086-1490   | Replication enhancer protein<br>135/15.59    |
| <i>AC4</i>    | ANA08968      | 300       | Complement 2176-2475   | Pathogenicity determinant<br>100/11.37       |
| <i>AC5</i>    | ANA08964      | 252       | Complement 733-984     | Unknown<br>84/9.21                           |
| Common Region |               | 124       | 2644-26                | -                                            |
| <b>DNA B</b>  | KU950431      | 2656      | -                      | -                                            |
| <i>BVI</i>    | ANA08969      | 771       | 420-1190               | Nuclear shuttle protein<br>257/29.29         |
| <i>BC1</i>    | ANA08970      | 897       | Complement 1222-2118   | Movement protein<br>299/33.76                |
| Common Region |               | 121       | 2562-26                | -                                            |
