# Supplementary material
Source: PubMed Central journal article supplement (PMC5877856)
Supplement: 13337_2018_429_MOESM4_ESM.pdf [file 13337_2018_429_MOESM4_ESM.pdf]

**Molecular evidence of an isolate of mungbean yellow mosaic India virus with a recombinant DNA B component occurring on mungbean from mid-hills of Meghalaya, India**

**VirusDisease**

Amrita Banerjee<sup>a,\*§</sup>, Yashi Umbrey<sup>b</sup>, Rohit M Yadav<sup>c</sup> and Somnath Roy<sup>c</sup>

<sup>a</sup>ICAR Research Complex for NEH Region, Umiam 793 103, Meghalaya, India

<sup>b</sup>College of Post Graduate Studies, Central Agricultural University, Umiam 793 103, Meghalaya, India

<sup>c</sup>ICAR-National Bureau of Plant Genetic Resources, Regional Station, Umiam 793 103, Meghalaya, India

<sup>§</sup>**Corresponding author:** [amrita.banerjee@icar.gov.in](mailto:amrita.banerjee@icar.gov.in) / [amrita.ars@gmail.com](mailto:amrita.ars@gmail.com)

**Supplementary Table 4** Percent identity of nucleotide sequence in complete genome, ORFs (AV1, AV2, AC1, AC2, AC3, AC4, AC5) and common region (CR) between DNA A of Mg-mungbean-1 (KU95030) and reference isolates

| Isolates                                   | Accession No. | Full DNA A | AV1   | AV2   | AC1   | AC2   | AC3   | AC4   | AC5   | CR    |
|--------------------------------------------|---------------|------------|-------|-------|-------|-------|-------|-------|-------|-------|
| MYMIV:India:Bengal                         | HF922628      | 97.59      | 98.19 | 97.66 | 96.60 | 99.12 | 99.26 | 97.99 | 97.62 | 97.96 |
| MYMIV:India:clonePPst1                     | KP313758      | 97.04      | 97.80 | 97.66 | 95.87 | 97.79 | 98.27 | 96.67 | 96.83 | 97.96 |
| MYMIV:India:SoybeanTN                      | AJ416349      | 96.13      | 96.51 | 96.78 | 96.88 | 95.14 | 94.07 | 96.67 | 96.03 | 94.90 |
| Legume yellow mosaic virus:Pakistan:14     | AJ512495      | 96.17      | 96.25 | 97.08 | 96.05 | 95.81 | 95.56 | 95.33 | 96.03 | 96.94 |
| Legume yellow mosaic virus:Pakistan:130/12 | AJ512497      | 96.02      | 95.74 | 96.49 | 96.05 | 96.03 | 96.05 | 95.00 | 96.43 | 94.90 |
| MYMIV:Pakistan:cloneMI2                    | FM208846      | 96.17      | 96.25 | 96.78 | 95.96 | 96.03 | 96.05 | 95.33 | 96.03 | 96.94 |
| MYMIV:Pakistan:cloneMI9                    | FM208842      | 96.17      | 96.38 | 96.78 | 96.14 | 95.81 | 95.56 | 95.33 | 96.43 | 96.94 |
| MYMIV:Pakistan:cloneMI7                    | FM208843      | 96.13      | 96.12 | 96.20 | 96.24 | 95.81 | 95.80 | 95.33 | 96.03 | 96.94 |
| MYMIV:Pakistan:cloneMI12                   | FM208844      | 96.21      | 96.38 | 97.37 | 96.05 | 95.59 | 95.56 | 95.33 | 96.43 | 96.94 |
| MYMIV:Pakistan:cloneMI13                   | FM208845      | 96.17      | 96.25 | 97.37 | 95.96 | 95.81 | 95.80 | 95.00 | 96.43 | 96.94 |
| MYMIV:Pakistan:cloneMI15                   | AM950268      | 96.10      | 96.12 | 96.78 | 96.14 | 95.14 | 95.06 | 95.33 | 96.03 | 98.98 |

|                                         |          |       |       |       |       |       |       |       |       |       |
|-----------------------------------------|----------|-------|-------|-------|-------|-------|-------|-------|-------|-------|
| MYMIV:Pakistan:Mungbean                 | AY269992 | 96.21 | 96.38 | 97.08 | 96.24 | 95.59 | 95.31 | 95.67 | 96.43 | 96.94 |
| MYMIV:Pakistan                          | AM992618 | 96.35 | 96.51 | 98.83 | 95.96 | 95.81 | 95.56 | 96.33 | 94.84 | 96.94 |
| MYMIV:Pakistan:cloneMI72                | FM955599 | 96.32 | 96.12 | 97.08 | 96.14 | 95.81 | 95.80 | 96.67 | 95.24 | 97.96 |
| MYMIV:Pakistan:cloneA1                  | FM208833 | 96.32 | 95.48 | 96.20 | 96.14 | 96.47 | 96.05 | 97.00 | 95.24 | 98.98 |
| MYMIV:Pakistan:cloneA1E                 | FM208834 | 96.28 | 95.48 | 96.20 | 96.14 | 96.47 | 96.05 | 97.00 | 95.24 | 98.98 |
| Legume yellow mosaic virus:Pakistan:106 | AJ512498 | 96.06 | 95.99 | 96.78 | 95.96 | 94.48 | 95.31 | 95.67 | 94.44 | 95.92 |
| MYMIV:Nepal                             | AY271895 | 96.17 | 95.99 | 97.08 | 96.24 | 94.92 | 95.80 | 95.33 | 94.05 | 94.90 |
| MYMIV:Pakistan:Cowpea                   | AY269990 | 96.21 | 95.74 | 96.78 | 96.05 | 94.92 | 96.05 | 95.33 | 94.44 | 96.94 |
| MYMIV:Pakistan:cloneA2                  | FM208835 | 96.13 | 95.87 | 96.49 | 96.05 | 95.14 | 96.05 | 95.00 | 94.84 | 96.94 |
| MYMIV:Pakistan:cloneA6G                 | FM208838 | 96.06 | 95.74 | 96.49 | 95.96 | 94.92 | 96.05 | 95.00 | 94.44 | 96.94 |
| MYMIV:Pakistan:cloneA14                 | FM208839 | 96.13 | 95.61 | 96.78 | 95.96 | 95.36 | 95.80 | 95.33 | 94.84 | 95.92 |
| MYMIV:India                             | DQ389154 | 96.32 | 95.48 | 96.78 | 96.42 | 95.14 | 95.56 | 97.00 | 94.84 | 97.96 |
| MYMIV:Pakistan:cloneA6                  | FM208837 | 96.24 | 95.87 | 97.37 | 96.24 | 94.70 | 95.06 | 97.00 | 94.84 | 98.98 |
| MYMIV:Pakistan:cloneA17                 | FM208840 | 96.28 | 95.48 | 95.91 | 96.51 | 94.92 | 95.56 | 96.67 | 94.84 | 98.98 |
| MYMIV:Pakistan:cloneA20                 | FM208841 | 95.88 | 95.35 | 95.91 | 95.68 | 94.48 | 95.80 | 95.67 | 94.44 | 98.98 |
| MYMIV:Pakistan:MV11                     | FR837935 | 96.35 | 95.87 | 96.78 | 96.23 | 94.48 | 95.56 | 96.67 | 94.84 | 98.98 |
| MYMIV:Pakistan:cloneMI75                | FM955598 | 96.10 | 95.35 | 96.20 | 96.42 | 95.14 | 94.81 | 97.00 | 94.44 | 98.98 |
| MYMIV:Pakistan:cloneA4                  | FM208836 | 96.32 | 95.61 | 96.49 | 96.33 | 95.14 | 95.56 | 96.33 | 94.44 | 98.98 |
| MYMIV:India:Varanasi:Dolichos           | AY547317 | 96.27 | 95.99 | 96.78 | 96.51 | 95.14 | 95.06 | 97.00 | 94.84 | 98.98 |
| MYMIV:Nepal:clone13P                    | JN543395 | 96.11 | 95.87 | 96.78 | 95.62 | 94.70 | 95.31 | 97.00 | 95.24 | 98.98 |
| MYMIV:Nepal:cloneMA2                    | JQ327845 | 96.11 | 95.87 | 96.78 | 95.62 | 94.70 | 95.31 | 97.00 | 95.24 | 98.98 |
| MYMIV:Nepal:cloneMA3                    | JQ327846 | 96.11 | 95.87 | 96.78 | 95.62 | 94.70 | 95.31 | 97.00 | 95.24 | 98.98 |
| MYMIV:India:Varanasi:Frenchbean         | KC019303 | 96.27 | 95.87 | 97.08 | 96.33 | 94.92 | 94.81 | 97.00 | 95.63 | 98.98 |
| MYMIV:India:Varanasi:Frenchbean         | KC019304 | 96.28 | 95.87 | 97.08 | 96.33 | 94.92 | 94.81 | 97.00 | 95.63 | 98.98 |
| MYMIV:Bangladesh                        | AF314145 | 96.79 | 98.19 | 99.42 | 95.87 | 98.01 | 98.27 | 94.67 | 96.43 | 88.78 |
| Cowpea golden mosaic virus:India        | AY618902 | 96.06 | 95.74 | 95.91 | 95.50 | 97.57 | 97.76 | 94.00 | 93.25 | 96.94 |

|                             |          |       |       |       |       |       |       |       |       |       |
|-----------------------------|----------|-------|-------|-------|-------|-------|-------|-------|-------|-------|
| MYMIV:India:MBK-A25         | AY937195 | 96.13 | 96.12 | 95.91 | 95.78 | 97.35 | 97.28 | 95.00 | 96.03 | 96.94 |
| MYMIV:Indonesia:Bogor       | JN368432 | 96.10 | 96.51 | 95.03 | 95.50 | 97.13 | 96.79 | 95.33 | 96.03 | 95.92 |
| MYMIV:Indonesia:Purwakarta1 | JN368433 | 96.06 | 96.25 | 95.32 | 95.50 | 97.57 | 97.28 | 95.67 | 94.84 | 95.92 |
| MYMIV:Indonesia:Purwakarta2 | JN368434 | 96.13 | 96.38 | 95.32 | 95.59 | 97.79 | 97.28 | 95.67 | 94.84 | 95.92 |
| MYMIV:Indonesia:Brebes4     | JN368439 | 96.10 | 96.38 | 95.32 | 95.59 | 97.57 | 97.04 | 95.67 | 94.84 | 95.92 |
| MYMIV:Indonesia:Brebes2     | JN368436 | 96.13 | 96.25 | 95.32 | 95.59 | 97.79 | 97.53 | 95.67 | 94.84 | 95.92 |
| MYMIV:Indonesia:Brebes1     | JN368435 | 96.02 | 95.99 | 95.32 | 95.41 | 97.35 | 97.53 | 95.67 | 94.84 | 95.92 |
| MYMIV:Indonesia:Brebes3     | JN368438 | 96.24 | 96.38 | 95.32 | 95.59 | 97.57 | 97.78 | 95.67 | 95.24 | 95.92 |
| MYMIV:Indonesia:Rembang     | JN368437 | 96.28 | 96.64 | 95.03 | 95.59 | 97.57 | 97.78 | 95.67 | 96.03 | 95.92 |
| MYMIV:India:Palampur        | FN794200 | 95.70 | 96.12 | 97.08 | 95.59 | 95.59 | 94.07 | 95.33 | 96.43 | 96.94 |
| MYMIV:India:cloneCA4        | KC911719 | 95.80 | 96.38 | 96.78 | 95.68 | 94.70 | 93.83 | 95.33 | 96.43 | 97.96 |
| MYMIV:India:cloneCA3        | KC911720 | 95.77 | 96.38 | 96.78 | 95.59 | 94.70 | 93.83 | 95.33 | 96.43 | 97.96 |
| MYMIV:India                 | DQ389153 | 95.79 | 96.12 | 96.78 | 95.96 | 95.36 | 95.06 | 96.00 | 96.83 | 94.44 |
| MYMIV:India:MJS1            | KR052025 | 95.69 | 95.73 | 96.49 | 96.14 | 95.36 | 95.06 | 96.33 | 96.02 | 94.90 |
| MYMIV:India                 | EU523045 | 95.95 | 95.99 | 96.49 | 96.42 | 95.36 | 95.06 | 96.67 | 96.43 | 94.90 |
| MYMIV:India                 | KC852204 | 95.80 | 95.61 | 95.61 | 96.14 | 95.81 | 95.56 | 96.67 | 96.03 | 94.90 |
| MYMIV:India:Akola           | AY271893 | 95.62 | 95.09 | 96.78 | 95.68 | 95.59 | 95.31 | 96.00 | 92.86 | 96.94 |
| MYMIV:Pakistan:cloneMI76    | FM955600 | 95.95 | 95.22 | 96.78 | 95.87 | 95.36 | 95.56 | 96.00 | 94.05 | 98.98 |
| MYMIV:India                 | DQ400847 | 95.80 | 95.61 | 95.32 | 95.86 | 95.81 | 95.06 | 95.67 | 94.84 | 96.91 |
| MYMV:India:VignaMaharashtra | AF314530 | 82.59 | 80.36 | 80.41 | 85.77 | 84.33 | 84.69 | 86.67 | 82.14 | 47.97 |
| MYMV:India:SoybeanMadurai   | AJ421642 | 82.64 | 80.36 | 80.70 | 85.67 | 84.77 | 84.94 | 86.33 | 82.14 | 67.35 |
| MYMV:India                  | DQ400848 | 83.03 | 80.49 | 79.53 | 85.95 | 84.77 | 86.17 | 87.33 | 81.35 | 71.13 |
| MYMV:India:cloneCA1         | KC911721 | 82.81 | 80.62 | 80.41 | 85.57 | 84.77 | 85.93 | 87.33 | 82.14 | 67.35 |
| MYMV:India:Urdbean:cloneMF2 | JQ398669 | 86.89 | 94.19 | 87.72 | 85.31 | 85.21 | 86.67 | 87.67 | 94.84 | 48.39 |
| HgYMV:India                 | AM932427 | 82.87 | 80.88 | 83.04 | 83.56 | 84.33 | 85.93 | 83.00 | 78.17 | 76.04 |
| DoYMV:India                 | AY309241 | 64.80 | 70.54 | 58.19 | 62.28 | 69.32 | 65.84 | 56.71 | 73.81 | 44.26 |

---

|                         |        |       |       |       |       |       |       |       |       |       |
|-------------------------|--------|-------|-------|-------|-------|-------|-------|-------|-------|-------|
| ToLCNDV:India:New Delhi | U15015 | 64.08 | 68.35 | 58.41 | 66.51 | 61.75 | 56.19 | 68.33 | 71.83 | 52.85 |
|-------------------------|--------|-------|-------|-------|-------|-------|-------|-------|-------|-------|

---
