# Supplementary material
Source: PubMed Central journal article supplement (PMC5877856)
Supplement: 13337_2018_429_MOESM5_ESM.pdf [file 13337_2018_429_MOESM5_ESM.pdf]

**Molecular evidence of an isolate of mungbean yellow mosaic India virus with a recombinant DNA B component occurring on mungbean from mid-hills of Meghalaya, India**

**VirusDisease**

Amrita Banerjee<sup>a\*</sup>, Yashi Umbrey<sup>b</sup>, Rohit M Yadav<sup>c</sup> and Somnath Roy<sup>c</sup>

<sup>a</sup>ICAR Research Complex for NEH Region, Umiam 793 103, Meghalaya, India

<sup>b</sup>College of Post Graduate Studies, Central Agricultural University, Umiam 793 103, Meghalaya, India

<sup>c</sup>ICAR-National Bureau of Plant Genetic Resources, Regional Station, Umiam 793 103, Meghalaya, India

<sup>\*</sup>Corresponding author: [amrita.banerjee@icar.gov.in](mailto:amrita.banerjee@icar.gov.in) / [amrita.ars@gmail.com](mailto:amrita.ars@gmail.com)

**Supplementary Table 5** Percent identity of nucleotide sequence in complete genome, ORFs (BV1 and BC1) and common region (CR) between DNA B of Mg-mungbean-1 (KU95031) and reference isolates

| Isolates                    | Accession No. | Full DNA B | BV1   | BC1   | CR    |
|-----------------------------|---------------|------------|-------|-------|-------|
| MYMV:India:LBG623           | KF928962      | 96.21      | 97.15 | 96.79 | 98.35 |
| MYMV:India:LjKu02           | KP319017      | 96.50      | 96.76 | 96.66 | 98.95 |
| MYMV:India:LjKu01           | KP319016      | 96.49      | 96.50 | 96.66 | 97.73 |
| MYMV:India:LBG623-EcoRI     | KF947526      | 96.72      | 96.76 | 96.88 | 99.17 |
| MYMV:India:clonePB1         | KC911731      | 94.08      | 96.23 | 95.54 | 72.63 |
| MYMV:India:cloneCB1         | KC911724      | 94.04      | 95.59 | 96.21 | 72.63 |
| MYMV:India: Namakkal        | DQ865202      | 94.09      | 96.11 | 96.21 | 68.42 |
| MYMV:India:Vigna            | AJ132574      | 93.70      | 95.85 | 95.99 | 51.26 |
| MYMV:India:VignaKA34        | AJ439057      | 93.71      | 95.98 | 95.99 | 50.00 |
| MYMV:India:sequence         | DQ400849      | 93.97      | 96.24 | 95.54 | 68.42 |
| MYMV:India:cloneVB4         | KC911725      | 93.55      | 96.23 | 95.54 | 68.42 |
| MYMV:India: cloneCB2        | KC911730      | 93.12      | 96.10 | 96.21 | 68.42 |
| MYMV:India:cloneVB3         | KC911726      | 93.74      | 96.11 | 95.99 | 64.21 |
| MYMV:India:cloneVB2         | KC911727      | 93.76      | 96.11 | 95.83 | 47.06 |
| MYMV:India:cloneVB1         | KC911728      | 93.58      | 95.98 | 95.87 | 64.21 |
| MYMV:India:VignaKA28        | AJ439058      | 93.97      | 95.98 | 96.21 | 67.37 |
| MYMV:India:VignaKA21        | AJ439059      | 93.97      | 96.11 | 95.99 | 72.63 |
| MYMV:India:cloneCB3         | KC911729      | 92.20      | 96.24 | 95.98 | 68.42 |
| MYMIV:India:cloneMBB-B31    | AY937196      | 94.53      | 95.33 | 95.43 | 96.77 |
| MYMIV:Indonesia:Bogor       | JN368440      | 94.00      | 94.94 | 94.09 | 96.77 |
| MYMIV:Indonesia:Purwakarta1 | JN368441      | 94.46      | 95.07 | 95.21 | 96.77 |
| MYMIV:Indonesia:Purwakarta2 | JN368442      | 94.46      | 95.07 | 95.21 | 96.77 |
| MYMIV:Indonesia:Brebes3     | JN368446      | 94.53      | 95.07 | 95.43 | 96.77 |
| MYMIV:Indonesia:Brebes4     | JN368447      | 94.34      | 94.94 | 95.09 | 96.77 |
| MYMIV:Indonesia:Brebes1     | JN368443      | 94.38      | 95.07 | 94.87 | 96.77 |
| MYMIV:Indonesia:Brebes2     | JN368444      | 94.39      | 95.07 | 95.21 | 96.34 |

|                             |          |       |       |       |       |
|-----------------------------|----------|-------|-------|-------|-------|
| MYMIV:Indonesia:Rembang     | JN368445 | 94.57 | 95.07 | 95.32 | 96.77 |
| MYMIV:India:cloneMBB-B31    | AY937196 | 94.53 | 95.33 | 95.43 | 96.77 |
| MYMIV:Indonesia:Bogor       | JN368440 | 94.00 | 94.94 | 94.09 | 96.77 |
| MYMIV:Indonesia:Purwakarta1 | JN368441 | 94.46 | 95.07 | 95.21 | 96.77 |
| MYMIV:Indonesia:Purwakarta2 | JN368442 | 94.46 | 95.07 | 95.21 | 96.77 |
| MYMIV:Indonesia:Brebes3     | JN368446 | 94.53 | 95.07 | 95.43 | 96.77 |
| MYMIV:Indonesia:Brebes4     | JN368447 | 94.34 | 94.94 | 95.09 | 96.77 |
| MYMIV:Indonesia:Brebes1     | JN368443 | 94.38 | 95.07 | 94.87 | 96.77 |
| MYMIV:Indonesia:Brebes2     | JN368444 | 94.39 | 95.07 | 95.21 | 96.34 |
| MYMIV:Indonesia:Rembang     | JN368445 | 94.57 | 95.07 | 95.32 | 96.77 |
| MYMIV:India:Palampur        | FR714861 | 92.03 | 93.90 | 92.64 | 86.32 |
| MYMIV:India:SoybeanTN       | AJ420331 | 91.43 | 93.13 | 92.98 | 89.25 |
| MYMIV:India:Akola           | AY271894 | 91.96 | 94.29 | 93.20 | 88.17 |
| MYMIV:Pakistan              | AM992617 | 91.66 | 93.64 | 92.87 | 86.32 |
| MYMIV :Pakistan:cloneMI5    | FM202442 | 91.39 | 93.00 | 92.75 | 86.32 |
| MYMIV:Pakistan:cloneMI10    | FM955609 | 91.32 | 92.48 | 92.98 | 86.32 |
| MYMIV:Pakistan:cloneMI6     | FM202443 | 91.36 | 92.87 | 92.87 | 86.32 |
| MYMIV:Pakistan:cloneMI20    | FM202447 | 91.05 | 92.48 | 92.53 | 85.26 |
| MYMIV:Pakistan:cloneMI3     | FM202441 | 91.17 | 92.61 | 92.64 | 86.32 |
| MYMIV:Pakistan:cloneMI8     | FM202444 | 91.01 | 93.39 | 92.42 | 86.32 |
| MYMIV:Pakistan:cloneMI17    | FM161881 | 91.74 | 93.26 | 93.31 | 90.32 |
| MYMIV:Pakistan:cloneMI16    | FM202445 | 91.81 | 93.51 | 93.09 | 89.25 |
| MYMIV:Pakistan:cloneMI71    | FM955603 | 91.13 | 91.83 | 93.42 | 89.25 |
| MYMIV:Pakistan:cloneMI73    | FM955604 | 91.62 | 92.74 | 93.53 | 90.32 |
| MYMIV:Pakistan:cloneMI77    | FM955605 | 91.02 | 91.96 | 93.53 | 89.25 |
| MYMIV:India                 | AF142440 | 90.19 | 92.16 | 92.31 | 94.07 |
| MYMIV:India:Mungbean        | AF416741 | 91.82 | 92.87 | 93.20 | 94.07 |
| MYMIV:India                 | EU523046 | 91.58 | 94.29 | 92.53 | 88.42 |
| MYMIV:India:DSR-YMV         | KP828155 | 91.01 | 94.29 | 92.53 | 85.26 |
| MYMIV:India:Varanasi        | DQ061273 | 91.83 | 94.42 | 92.64 | 85.26 |
| MYMIV:Pakistan:cloneMI74    | FM955606 | 91.54 | 94.16 | 92.53 | 88.17 |
| MYMIV:Pakistan:cloneMI30    | FM958506 | 91.58 | 93.90 | 93.20 | 89.25 |
| MYMIV:Pakistan:cloneB4      | FM202439 | 91.35 | 94.03 | 92.20 | 89.25 |
| MYMIV:Pakistan:cloneB13     | FM202440 | 91.54 | 94.16 | 92.42 | 88.17 |
| MYMIV:Nepal:cloneS31        | JN543396 | 91.42 | 93.90 | 92.64 | 89.25 |
| MYMIV:Nepal:cloneRA46       | JQ327849 | 91.39 | 93.90 | 92.53 | 89.25 |
| MYMIV:India:Soybean         | AY049771 | 91.78 | 94.03 | 92.64 | 92.37 |
| MYMIV:India:Varanasi        | KC019305 | 91.58 | 93.64 | 92.64 | 91.40 |
| MYMIV:India                 | AY939925 | 91.54 | 93.90 | 92.42 | 89.25 |

---

---

|                         |          |       |       |       |       |
|-------------------------|----------|-------|-------|-------|-------|
| HgYMV:India:Lima bean   | AM932430 | 71.40 | 73.80 | 79.15 | 62.50 |
| DoYMV:India:DC          | KJ481206 | 61.49 | 60.16 | 69.80 | 49.58 |
| ToLCNDV:India:New Delhi | U15017   | 48.78 | 47.42 | 52.02 | 53.33 |

---
