# Supplementary material
Source: PubMed Central journal article supplement (PMC5877856)
Supplement: 13337_2018_429_MOESM6_ESM.pdf [file 13337_2018_429_MOESM6_ESM.pdf]

**Molecular evidence of an isolate of mungbean yellow mosaic India virus with a recombinant DNA B component occurring on mungbean from mid-hills of Meghalaya, India**

**VirusDisease**

Amrita Banerjee<sup>a\*§</sup>, Yashi Umbrey<sup>b</sup>, Rohit M Yadav<sup>c</sup> and Somnath Roy<sup>c</sup>

<sup>a</sup>ICAR Research Complex for NEH Region, Umiam 793 103, Meghalaya, India

<sup>b</sup>College of Post Graduate Studies, Central Agricultural University, Umiam 793 103, Meghalaya, India

<sup>c</sup>ICAR-National Bureau of Plant Genetic Resources, Regional Station, Umiam 793 103, Meghalaya, India

<sup>§</sup>Corresponding author: [amrita.banerjee@icar.gov.in](mailto:amrita.banerjee@icar.gov.in) / [amrita.ars@gmail.com](mailto:amrita.ars@gmail.com)

**Supplementary Table 6** *P*-values identified under different recombination methods

| Detection method | <i>P</i> -value          |
|------------------|--------------------------|
| RDP              | 2.063 x 10 <sup>-4</sup> |
| GENCONV          | 2.500 x 10 <sup>-5</sup> |
| MAXCHI           | 5.274 x 10 <sup>-3</sup> |
| CHIMERA          | 3.286 x 10 <sup>-3</sup> |
| SISCAN           | 1.303 x 10 <sup>-9</sup> |
