# Supplementary material
Source: PubMed Central journal article supplement (PMC5877856)
Supplement: 13337_2018_429_MOESM7_ESM.pdf [file 13337_2018_429_MOESM7_ESM.pdf]

**Molecular evidence of an isolate of mungbean yellow mosaic India virus with a recombinant DNA B component occurring on mungbean from mid-hills of Meghalaya, India**

**VirusDisease**

Amrita Banerjee<sup>a\*§</sup>, Yashi Umbrey<sup>b</sup>, Rohit M Yadav<sup>c</sup> and Somnath Roy<sup>c</sup>

<sup>a</sup>ICAR Research Complex for NEH Region, Umiam 793 103, Meghalaya, India

<sup>b</sup>College of Post Graduate Studies, Central Agricultural University, Umiam 793 103, Meghalaya, India

<sup>c</sup>ICAR-National Bureau of Plant Genetic Resources, Regional Station, Umiam 793 103, Meghalaya, India

<sup>§</sup>Corresponding author: [amrita.banerjee@icar.gov.in](mailto:amrita.banerjee@icar.gov.in) / [amrita.ars@gmail.com](mailto:amrita.ars@gmail.com)

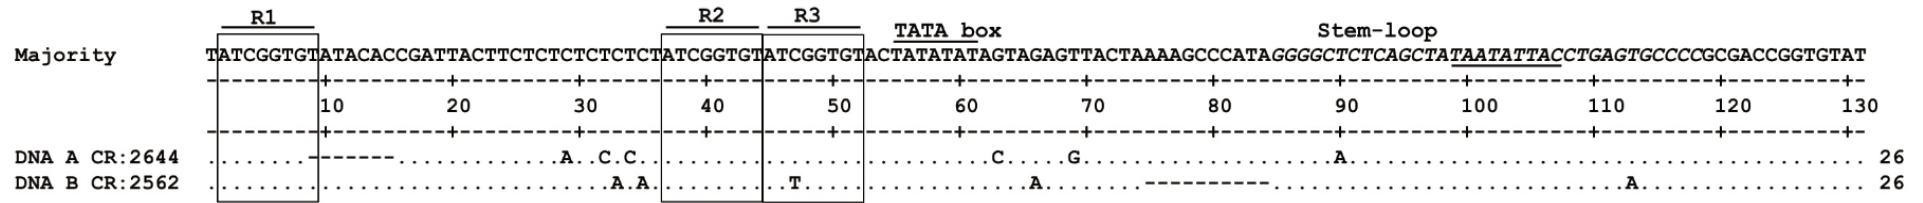

**Supplementary Fig. 1** Sequence alignment of CR of DNA A and DNA B of YMV isolate (Mg-mungbean-1) from Meghalaya. The nucleotide coordinates of the sequences are shown as ‘Majority’. Symbols like ‘...’ indicate identity with majority and ‘-’ indicate deletion. The stem-loop region is indicated in italics form and the invariant nonanucleotide motif (TAATATTAC) within the stem-loop is underlined. Three reported replication initiation protein binding iteron sequence (ATCGGTGT) are indicated by R1, R2 and R3
