# Supplementary material
Source: PubMed Central journal article supplement (PMC5877856)
Supplement: 13337_2018_429_MOESM8_ESM.pdf [file 13337_2018_429_MOESM8_ESM.pdf]

**Molecular evidence of an isolate of mungbean yellow mosaic India virus with a recombinant DNA B component occurring on mungbean from mid-hills of Meghalaya, India**

**VirusDisease**

Amrita Banerjee<sup>a\*§</sup>, Yashi Umbrey<sup>b</sup>, Rohit M Yadav<sup>c</sup> and Somnath Roy<sup>c</sup>

<sup>a</sup>ICAR Research Complex for NEH Region, Umiam 793 103, Meghalaya, India

<sup>b</sup>College of Post Graduate Studies, Central Agricultural University, Umiam 793 103, Meghalaya, India

<sup>c</sup>ICAR-National Bureau of Plant Genetic Resources, Regional Station, Umiam 793 103, Meghalaya, India

<sup>§</sup>Corresponding author: [amrita.banerjee@icar.gov.in](mailto:amrita.banerjee@icar.gov.in) / [amrita.ars@gmail.com](mailto:amrita.ars@gmail.com)

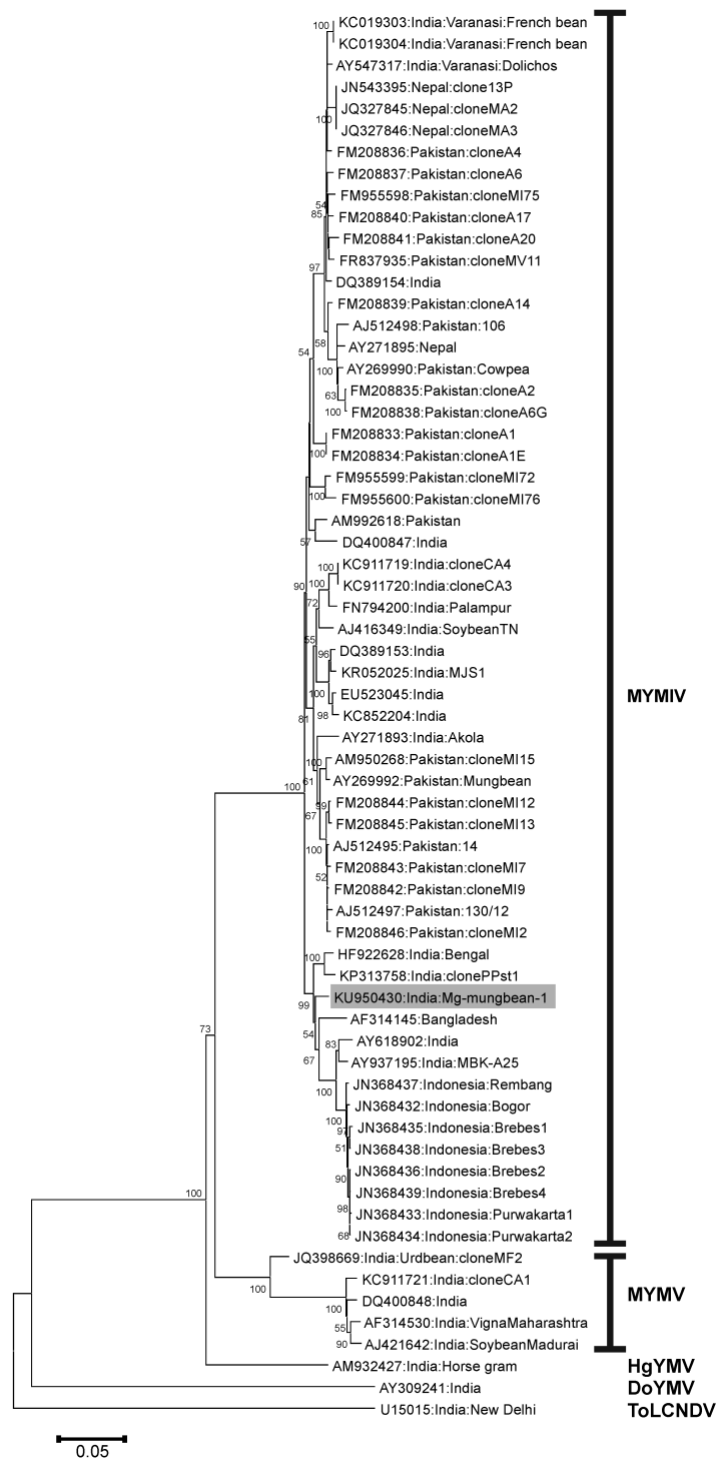

Supplementary Fig. 2 Phylogenetic relationship based on nucleotide sequences of DNA A of YMV isolate from Meghalaya (Mg-mungbean-1), reference isolates of legume-infecting begomoviruses (MYMIV, MYMV, HgYMV and DoYMV) from South-East Asia, and an outgroup member *Tomato leaf curl New Delhi virus* (ToLCNDV). Each sequence is labelled with the GenBank accession number followed by origin and isolate name. Current isolate has been shown in the box
